1 **COVID-19 cases from the first local outbreak of SARS-CoV-2 B.1.1.7 variant in**  
2 **China presented more serious clinical features: a prospective, comparative cohort**  
3 **study**

4  
5 Yang Song<sup>2\*</sup>, Ziruo Ge<sup>1\*</sup>, Shuping Cui<sup>1, 3\*</sup>, Di Tian<sup>1</sup>, Gang Wan<sup>1</sup>, Shuangli Zhu<sup>2</sup>,  
6 Xianbo Wang<sup>1</sup>, Yu Wang<sup>1</sup>, Xiang Zhao<sup>2</sup>, Pan Xiang<sup>1</sup>, Yanli Xu<sup>1</sup>, Tingyu Zhang<sup>1</sup>, Long  
7 Liu<sup>1</sup>, Gang Liu<sup>1</sup>, Yanhai Wang<sup>2</sup>, Jianbo Tan<sup>1</sup>, Wei Zhang<sup>1#</sup>, Wenbo Xu<sup>2#</sup>, and Zhihai  
8 Chen<sup>1#</sup>

9  
10 <sup>1</sup>Emergency department of COVID-19, Beijing Ditan Hospital, Capital Medical  
11 University, Beijing, China.

12 <sup>2</sup>National Institute for Viral Disease Control and Prevention, Chinese Center for  
13 Disease Control and Prevention, Beijing, China.

14 <sup>3</sup>Peking University, Ditan Teaching Hospital, Beijing, China.

15  
16  
17 \*Yang Song, Ziruo Ge ,and Shuping Cui contributed equally to this paper.

18 #Co-corresponding authors: Zhihai Chen, E-mail: [chenzhihai0001@126.com](mailto:chenzhihai0001@126.com); Wenbo  
19 Xu, E-mail: [xuwb@ivdc.chinacdc.cn](mailto:xuwb@ivdc.chinacdc.cn); Wei Zhang, E-mail: [snowpine12@sina.com](mailto:snowpine12@sina.com)

20  
21  
22 **NOTE: This preprint reports new research that has not been certified by peer review and should not be used to guide clinical practice.**

## 23 **Summary**

24 **Background:** The SARS-CoV-2 B.1.1.7 variant which was first identified in the United  
25 Kingdom (U.K.) has increased sharply in numbers worldwide and was reported to be  
26 more contagious. On January 17, 2021, a COVID-19 clustered outbreak caused by  
27 B.1.1.7 variant occurred in a community in Daxing District, Beijing, China. Three  
28 weeks prior, another non-variant (lineage B.1.470) COVID-19 outbreak occurred in  
29 Shunyi District, Beijing. This study aimed to investigate the clinical features of B.1.1.7  
30 variant infection.

31 **Methods:** A prospective cohort study was conducted on COVID-19 cases admitted to  
32 Ditan hospital since January 2020. Data of 74 COVID-19 cases from two independent  
33 COVID-19 outbreaks in Beijing were extracted as study subjects from a Cloud Database  
34 established in Ditan hospital, which included 41 Shunyi cases (Shunyi B.1.470 group)  
35 and 33 Daxing cases (Daxing B.1.1.7 group) that have been hospitalized since  
36 December 25, 2020 and January 17, 2021, respectively. We conducted a comparison of  
37 the clinical characteristics, RT-qPCR results and genomic features between the two  
38 groups.

39 **Findings:** Cases from Daxing B.1.1.7 group (15 [45.5%] male; median age, 39 years  
40 [range, 30.5, 62.5]) and cases from Shunyi B.1.470 group (25 [61.0%] male; median  
41 age, 31 years [range, 27.5, 41.0]) had a statistically significant difference in median age  
42 ( $P=0.014$ ). Seven clinical indicators of Daxing B.1.1.7 group were significantly higher  
43 than Shunyi B.1.470 group including patients having fever over 38°C (14/33 [46.43%]  
44 in Daxing B.1.1.7 group vs. 9/41 (21.95%) in Shunyi B.1.470 group [ $P=0.015$ ]), C-

45 reactive protein ([CRP, mg/L], 4.30 [2.45, 12.1] vs. 1.80, [0.85, 4.95], [P = 0.005]),  
46 Serum amyloid A ([SAA, mg/L], 21.50 [12.50, 50.70] vs. 12.00 [5.20, 26.95], [P =  
47 0.003]), Creatine Kinase ([CK, U/L]), 110.50 [53.15,152.40] vs. 70.40 [54.35,103.05],  
48 [P = 0.040]), D-dimer ([DD, mg/L], 0.31 [0.20, 0.48] vs. 0.24 [0.17,0.31], [P = 0.038]),  
49 CD4<sup>+</sup> T lymphocyte ([CD4<sup>+</sup> T, mg/L], [P = 0.003]) , and Ground-glass opacity (GGO)  
50 in lung (15/33 [45.45%] vs. 5/41 [12.20%], [P =0.001]). After adjusting for the age  
51 factor, B.1.1.7 variant infection was the risk factor for CRP (P = 0.045, Odds ratio [OR]  
52 2.791, CI [1.025, 0.8610]), SAA (0.011, 5.031, [1.459, 17.354]), CK (0.034, 4.34, [0.05,  
53 0.91]), CD4<sup>+</sup> T ( 0.029, 3.31, [1.13, 9.71]), and GGO (0.005, 5.418, [1.656, 17.729]) of  
54 patients. The median Ct value of RT-qPCR tests of the N-gene target in the Daxing  
55 B.1.1.7 group was significantly lower than the Shunyi B.1.470 group (P=0.036). The  
56 phylogenetic analysis showed that only 2 amino acid mutations in spike protein were  
57 detected in B.1.470 strains while B.1.1.7 strains had 3 deletions and 7 mutations.

58 **Interpretation:** Clinical features including a more serious inflammatory response,  
59 pneumonia and a possible higher viral load were detected in the cases infected with  
60 B.1.1.7 SARS-CoV-2 variant. It could therefore be inferred that the B.1.1.7 variant may  
61 have increased pathogenicity.

62 **Funding:** The study was funded by the National Key Research and Development  
63 Program (grant nos.2020YFC0846200 and 2020YFC0848300) and National Natural  
64 Science Foundation of China (grant no. 82072295).

65

66 **Keywords:** COVID-19; SARS-CoV-2; B.1.1.7 Variant; clinical features; RT-qPCR test;

67 whole-genomic analysis

68

## 69 INTRODUCTION

70 Since December 2019, the coronavirus disease-19 (COVID-19) pandemic caused by the

71 highly infectious virus severe acute respiratory syndrome coronavirus-2 (SARS-CoV-2)

72 has been rapidly spreading, which has posed a great threat to global public health<sup>1,2</sup>.

73 With the continuous transmission and mutation of SARS-CoV-2, some viral variants of

74 concern (VOC) and viriants of interest (VOI) have been reported in recent months<sup>3-8</sup>.

75 On December 14, 2020, the United Kingdom reported a SARS-CoV-2 variant of

76 concern (VOC) that belonged to the PANGO lineage B.1.1.7<sup>9,10</sup>, referred to as "SARS-

77 CoV-2 VOC-202012/01", "B.1.1.7", 501Y.V1 or 20I/501Y.V1 (the term B.1.1.7 was

78 used in the whole text). The B.1.1.7 variant was estimated to have emerged in late

79 September 2020 and has increased sharply to become the predominant SARS-CoV-2

80 strain in England, which has soon become a global concern<sup>7,11,12</sup>.

81

82 With the strict prevention and control policies implemented in China, local epidemics

83 have rarely occurred in Beijing. Occasionally, a small clustered outbreak triggered by

84 an imported SARS-CoV-2 strain with only one chain of transmission could happen. On

85 January 17, 2021, a clustered COVID-19 outbreak in community had taken place in

86 Daxing District, Beijing. Confirmed by whole-genome sequencing and lineage typing

87 results<sup>9,10</sup>, this outbreak was caused by SARS-CoV-2 B.1.1.7 variants. This is the first

88 local transmission of B.1.1.7 variants in China, which constituted a new challenge to

89 the prevention and control of COVID-19 in China. Meanwhile, three weeks prior to the

90 Daxing outbreak, there was another local COVID-19 outbreak occurring in Shunyi  
91 district in Beijing, caused by the B.1.470 lineage which was mostly detected in Asian  
92 countries, both outbreaks had been well-controlled within a month.

93

94 Since the early transmission of COVID-19 in January, 2020, a cohort of COVID-19  
95 cases have been established in Beijing Ditan hospital; and since June, 2020, the COVID-  
96 19 cases in Beijing have only been admitted to Ditan hospital, following which a cloud  
97 database had been established and maintained by Ditan hospital cooperating with a  
98 Beijing technology company (Beijing Zechuang Tiancheng Technology Development  
99 Co., Ltd). All relevant data for COVID-19 cases are constantly being entered into the  
100 cloud database for preparing for future prospective studies. So far, the data of about 690  
101 cases were completely inputted. In this study, groups of two recent independent  
102 clustered outbreaks caused by distinct lineage strains and occurring in different districts  
103 in Beijing (Daxing B.1.1.7 group and Shunyi B.1.470 group) were selected as the study  
104 subjects from the cloud database. The COVID-19 cases from the two groups received  
105 alike clinical tests and treatments and each case was observed for at least 28 days. The  
106 discharge criteria included disappearance or marked improvement of clinical symptoms  
107 combined with two real-time reverse transcription quantitative PCR (RT-qPCR) tests  
108 negative on nasopharyngeal swabs more than 24 hours apart, based on *Diagnosis and*  
109 *Treatment Protocol for Novel Coronavirus Pneumonia Patients (Version 8)*.

110

111 Recent studies indicated that the B.1.1.7 variant has a 50% higher transmissibility<sup>13</sup>.

112 Fortunately, some immunological and serological studies indicated that the B.1.1.7  
113 variant does not escape vaccine protection<sup>14,15</sup>. The UK government and related  
114 scientists suggested the B.1.1.7 variant may be more deadly, but currently there is no  
115 published biological experimental evidence regarding the virulence or pathogenicity of  
116 B.1.1.7<sup>16</sup>.

117

118 This study is aiming at comparing the clinical presentations, the RT-qPCR results and  
119 the whole-genomic features of cases from Daxing B.1.1.7 group and Shunyi B.1.470  
120 group, in order to evaluate the COVID-19 severity of the cases infected by the B.1.1.7  
121 variant.

122

## 123 **METHODS**

### 124 **Study design and recruitment of cases**

125 This prospective cohort study were reported according to the STROBE statement and  
126 included two groups with a total of 74 confirmed COVID-19 cases from Beijing Ditan  
127 Hospital, Daxing B.1.1.7 group and Shunyi B.1.470 group, based on the different  
128 Districts and genomic typing results. The data of all the cases from the two groups were  
129 extracted from the cloud database. The confirmed cases referred to patients with clinical  
130 features of COVID-19 and positive RT-qPCR test for SARS-CoV-2 RNA at least once  
131 on the respiratory specimens collected. The Daxing B.1.1.7 group contained a total of  
132 33 cases whereas Shunyi B.1.470 group contained 41 cases. COVID-19 patients were  
133 diagnosed according to the 8th version of *Diagnosis and Treatment Protocol for Novel*

134 *Coronavirus Pneumonia Patients*, and the clinical severity was categorized into 4 grades:  
135 mild (the clinical symptoms were mild, and there was no sign of pneumonia on imaging),  
136 moderate (showing fever and respiratory symptoms, imaging manifestations of  
137 pneumonia), severe (1. dyspnea with a respiratory rate >30/min; 2. hypoxemia with  
138 oxygen saturation <93%; 3. PaO<sub>2</sub>/FiO<sub>2</sub> <300 mmHg; 4. or the clinical symptoms  
139 worsened gradually, and the lung imaging showed that the lesions progressed more than  
140 50% within 24-48 hours) and critical (developed complications including 1. respiratory  
141 failure that needs mechanical ventilation; 2. shock; 3. patients with other organ failure  
142 need ICU monitoring treatment). The asymptomatic cases with no clinical symptoms  
143 but positive for RT-qPCR were also required to be admitted to the hospital. Ditan  
144 Hospital is affiliated with Capital Medical University, an academic tertiary care center  
145 in Beijing, China. The hospital is also a designated center in Beijing for the diagnosis  
146 and treatment of COVID-19. Each case was observed for at least 28 days. As of this  
147 study, four cases from Daxing outbreak and one case from Shunyi outbreak were still  
148 hospitalized.

149  
150 The index case of the Shunyi B.1.470 group was an asymptomatic case confirmed on  
151 December 23, 2020. He intended to leave Beijing for taking an exam, so he took the  
152 initiative to conduct nucleic acid detection before leaving in accordance with the  
153 regulations. Further epidemiological investigation indicated that he was infected by an  
154 salesperson of a mall, and the salesperson was infected by an foreign personnel who  
155 was an imported asymptomatic case that had tested negative for SARS-CoV-2 RNA

156 within 14 days of entry. This was a clustered outbreak occurred mainly in workplaces  
157 in Shunyi District, with the majority of cases being young people. In addition, a family  
158 clustered infection including 7 members was detected.

159

160 The discovery of the index case of the Daxing B.1.1.7 group came from the routine  
161 screening of SARS-CoV-2 nucleic acid detection of a resident who intended to return  
162 home. The epidemiological investigation and nucleic acid detection of his close contacts  
163 indicated that a clustered outbreak had already occurred in the community where the  
164 case resided, of which most cases were elderly and children. Family clustered infection  
165 was mostly seen, involving a total of 13 families, of which 5 families were infected with  
166 more than 3 members and several families were infected with all members.

167

### 168 **Data collection**

169 The data of the 74 COVID-19 cases from the two groups were extracted from the cloud  
170 database. Medical record review was performed to collect patients' underlying medical  
171 conditions and symptoms at the time of diagnosis, including data of chronology of  
172 symptom onset, history of first presentation, disease progression, past medical history,  
173 physical findings, laboratory test results, imaging results, treatment and hospital course.  
174 In addition, epidemiological data of the patients were collected. Individual data were  
175 compiled into two groups of patients with the Daxing B.1.1.7 group and the Shunyi  
176 B.1.470 group for further analyses.

177

### 178 **Laboratory Testing**



179 The oropharyngeal swab, nasopharyngeal swab, or sputum specimens obtained from  
180 patients during their hospital stays were collected for RT-qPCR testing. Viral RNA was  
181 extracted directly from 200- $\mu$ L swab samples with a QIAamp Viral RNA Mini Kit  
182 (QIAGEN, Germany). RT-qPCR was conducted using a commercial Novel SARS-CoV-  
183 2 Nucleic Acid Test Kit (BioGerm, Shanghai, China) with a fluorescence PCR detector  
184 following the manufacturers' instructions. A TaqMan probe-based kit was designed to  
185 detect the ORF1ab and N genes of SARS-CoV-2 in 1 reaction. Corresponding serum  
186 samples were tested for anti-SARS-CoV-2 antibodies using a chemiluminescence  
187 immunoassay (CLIA, Bioscience, Qingchong, China).

188

### 189 **Whole-genome sequencing and analysis**

190 The selected swab samples of the patients were then sent to China CDC for further  
191 whole-genome sequencing. Libraries were prepared using a Nextera XT Library Prep  
192 Kit (Illumina, San Diego, CA, USA), and the resulting DNA libraries were sequenced  
193 on either a MiSeq or an iSeq platform (Illumina) using a 300-cycle reagent kit. Mapped  
194 assemblies were generated using the SARS-CoV-2 genome (accession number  
195 NC\_045512) as a reference. Variant calling, genome alignment, and sequence  
196 illustrations were generated with CLCBio software. The whole-genome sequence  
197 alignment was conducted using the Muscle tool in MEGA (v7.0). Neighbor-joining  
198 phylogenetic tree was constructed using the Kimura 2-parameter model with 1,000  
199 bootstrap replicates. Genomic lineage designation was used "PANGO lineage" typing  
200 method (<https://cov-lineages.org/>).

201

## 202 **Statistical analysis**

203 The statistical analyses were performed using SPSS Version 24.0 (SPSS IBM, Armonk,  
204 NY, USA). We compiled data from each individual patient for the demography and  
205 clinical variables. Normal continuous variables were represented by mean and std, T-  
206 test was used to compare the statistical difference. Non-normal continuous variables  
207 were represented by median and quartile ranges, Mann-Whitney U test was used.  
208 Categorical variables were expressed as numbers and percentages, Chi-squared and  
209 Fisher's exact tests were used to compare the statistical difference. Binary logistic  
210 regression analysis was performed to analyze the risk factors for the severity of COVID-  
211 19. All tests were two-tailed, and statistical significance was defined as P value lower  
212 than 0.05.

213

## 214 **Role of the funding source**

215 The study was funded by the National Key Research and Development Program (grant  
216 nos. 2020YFC0846200 and 2020YFC0848300) and National Natural Science  
217 Foundation of China (grant no. 82072295). The funding body was not involved in the  
218 study design, clinical sample collection, data analysis, and interpretation or writing of  
219 the manuscript.

220 .

## 221 **RESULTS**

222 **Whole genome sequencing and analysis of the SARS-CoV-2 samples in the two**

## 223 **outbreaks**

224 Clinical samples from 8 patients of the Daxing outbreak, 13 patients of the Shunyi  
225 Outbreak were sent to the China CDC for further sequencing. Some samples may be  
226 degraded due to transportation or storage. Finally, a total of 9 whole-genome sequences  
227 with good quality and coverage were obtained, including 7 from the Daxing outbreak  
228 and 2 from the Shunyi outbreak. Compared with the Wuhan reference sequence  
229 (EPI\_ISL\_402119), seven Daxing strains shared 31 nucleotide substitutions, six strains  
230 were identical, one had an addition substitution (32 substitutions) (Table 1). These seven  
231 strains shared all 28 nucleotide mutations that were first detected in the B.1.1.7 variant  
232 from the UK (Figure 2). Likewise, they had 3 amino acid deletions and 7 amino acid  
233 mutations on the spike protein corresponding to the characteristics of B.1.1.7 variants.

234

235 The two strains of the Shunyi outbreak shared 24 nucleotide substitutions and one of  
236 them had an additional substitution (Table 1), which contained the single nucleotide  
237 polymorphisms (SNPs) defining PANGO lineage B.1.470 confirmed by Pangolin  
238 COVID-19 Lineage Assigner Web application<sup>9,10</sup> (<https://pangolin.cog-uk.io/>). This  
239 lineage is composed of only a hundred more sequences on the GISAID database, most  
240 of which (77.0%) were from Indonesia. Strains from the GISAID database<sup>17</sup> which had  
241 high homology with these 2 strains were retrieved, including a Singaporean and an  
242 Indonesian strain that shared 21 and 20 nucleotide substitutions with the Shunyi strains,  
243 respectively (Figure 1).

244

245 **Comparison of the general information and basic clinical manifestations in the two**  
246 **groups**

247 Of the 33 cases from the Daxing B.1.1.7 group and 41 from the Shunyi B.1.470 group  
248 (table1), male cases accounted for 45.50% and 61.00%, respectively. The median age  
249 of the two groups (39 years [interquartile range [IQR]30.50-62.50], vs. 31 years [IQR  
250 27.50-41.00]) showed a statistically significant difference ( $P = 0.014$ ). Moderate cases  
251 took up the highest percentage of both groups (66.67% vs. 48.78%). The most common  
252 symptoms in both groups were fever, followed by dry cough and dry throat/pharyngeal  
253 discomfort. Of patients infected with B.1.1.7 variant, 14 (46.43%) had fever over 38°C,  
254 significantly higher than 9 (21.95%) observed in patients infected with B.1.470 non-  
255 variant ( $P = 0.015$ ).

256  
257 **Comparison of laboratory tests, imageological diagnosis and treatment measures**

258 There were no significant differences in the levels of white blood cells, neutrophils,  
259 lymphocytes, platelets, Alanine and Aspartate aminotransferases in the two groups  
260 (Table 2). However, the level of C-reactive protein (CRP), serum amyloid A(SAA),  
261 creatine kinase (CK), and D-dimer (DD) in the Daxing B.1.1.7 group was significantly  
262 higher than the Shunyi B.1.470 group ( $P = 0.005, 0.003, 0.040$  and  $0.038$ , respectively).  
263 In addition, except for 1 case in the Daxing B.1.1.7 group and 2 cases in the Shunyi  
264 B.1.470 group who did not tested for T lymphocyte due to their young age, the abnormal  
265 proportion of  $CD4^+$  T lymphocytes( $CD4^+T$ ) in the Daxing B.1.1.7 group was  
266 significantly higher than the Shunyi B.1.470 group ( $P = 0.003$ ). For the imageological

267 diagnosis, there were no significant differences in the incidence of pneumonia, but the  
268 Ground-glass opacity (GGO) observed in the B.1.1.7-variant patients was significantly  
269 higher ( $P = 0.001$ ). The antibody detection results and clinical treatments were not  
270 statistically different in the two groups.

271

### 272 **B.1.1.7 variant infection was the main risk for more serious COVID-19 clinical** 273 **features**

274 In order to avoid the influence of older age in the Daxing B.1.1.7 group, binary logistic  
275 regression analysis was further performed for investigating the level of CRP ( $< 7$  mg/L  
276 or  $\geq 7$  mg/L), SAA ( $< 10$  mg/L or  $\geq 10$  mg/L), CK ( $< 150$  U/L or  $\geq 150$  U/L), DD ( $<$   
277  $0.5$  mg/L or  $\geq 0.5$  mg/L), CD4<sup>+</sup> T ( $< 706$  mg/L or  $\geq 706$  mg/L) and GGO in the lung  
278 (Table 3). After adjusting for age factor, we found that the group factor (B.1.1.7 variant  
279 infection or non-variant infection) was the main risk for CRP (Odds ratio [OR] = 2.79,  
280  $P = 0.045$ ), SAA (OR = 5.03,  $P = 0.011$ ), CK (OR = 0.22,  $P = 0.034$ ), GGO (OR = 5.42,  
281  $P = 0.005$ ), and CD4<sup>+</sup> T (OR = 3.31,  $P = 0.029$ ) of patients.

282

### 283 **Comparison of RT-qPCR threshold-crossing (Ct) values between the two groups**

284 During the hospitalization of all the cases, several RT-qPCR tests using nasopharyngeal  
285 swabs were regularly conducted based on their disease progression and clinical  
286 manifestations. The lowest Ct value of ORF1ab and N gene of each case was selected  
287 and compared between the two groups (Table 4). The Kits for RT-qPCR testing had  
288 uniform lot number and the instrument was the same. The median Ct value of ORF1ab-

289 gene target in the two groups had no statistically significant difference, but that of N-  
290 gene target was significantly lower for the Daxing B.1.1.7 group than the Shunyi  
291 B.1.470 group ( $t=2.139$ ,  $P=0.036$ ). The distribution of the samples in the two groups  
292 was compared within all ORF1ab and N-gene Ct values (Figure 1). Figure 1b indicates  
293 that in N-gene, the median Ct values of the Daxing B.1.1.7 group were lower. In addition,  
294 we also adjusted the age factor and performed binary logistic regression analysis for the  
295 level of Ct values ( $>18$  or  $\leq 18$ ) (Table 5). Similarly, patients infected with the B.1.1.7  
296 variant had a 4.484-fold higher risk of having N gene Ct values  $\leq 18$  in nasopharyngeal  
297 swab specimens than the patients infected with non-variant (OR=4.484,  $P=0.024$ ).

298

## 299 **DISCUSSION**

300 Researches have commonly indicated that the SARS-CoV-2 B.1.1.7 variant had higher  
301 transmissibility while whether it had increased pathogenicity remained controversial. In  
302 this study, we analyzed the differences of clinical characteristics, laboratory tests, RT-  
303 qPCR results and whole-genome features between the 33 cases infected with SARS-  
304 CoV-2 B.1.1.7 variant and 41 cases infected with non-variant, and indicated that  
305 COVID-19 cases infected with the B.1.1.7 variant had more serious clinical features  
306 and possibly higher viral loads. This therefore implies that the B.1.1.7 variant may have  
307 increased pathogenicity.

308

309 In the Daxing B.1.1.7 group, we observed an older age of patients than the Shunyi  
310 B.1.470 group, probably due to the living characteristics of residents from the

311 community, as many retired older people were more frequently active in the community.

312

313 B.1.1.7 variant infection could lead to a more serious inflammatory response, acute  
314 response process and more severe pneumonia as indicated by the following results:  
315 compared B.1.1.7 variant cases with non-variant cases, (1) there were more patients  
316 with body temperature over 38°C; (2) the laboratory tests of the level of CRP, SAA, CK  
317 and DD was significantly higher; (3) the abnormal proportion of CD4<sup>+</sup>T was  
318 significantly higher; (4) the patients that had ground glass opacity in the lung were  
319 significantly more.

320

321 When comparing the Ct values of the RT-qPCR results between the two groups, samples  
322 from the Daxing B.1.1.7 group were related to lower Ct values of N gene, from which  
323 it could be speculated that B.1.1.7 variant samples may have a relatively higher viral  
324 load. This result corresponded with previous research showing that the B.1.1.7 variant  
325 is associated with significantly higher viral loads in samples tested by ThermoFisher  
326 TaqPath RT-qPCR<sup>18</sup>. Even though the sample size in this study was relatively small, and  
327 no significant difference was detected in ORF gene, statistical results for N gene could  
328 still somehow indicate a higher infectivity of the B.1.1.7 variant.

329

330 SARS-CoV-2 B.1.1.7 variant infection may be the main risk for more serious clinical  
331 features after adjusting the age factor. Old-age has been considered as an important  
332 factor in SARS-CoV-2 infection and severe COVID-19, because elderly patients have a

333 weaker immune system function and are prone to multi-system organ dysfunction and  
334 even failure<sup>19-22</sup>. Thus, we adjusted the effect of older age of the Daxing B.1.1.7 group,  
335 and still came to the consistent statistically significant results that cases infected with  
336 the B.1.1.7 variant presented more serious clinical features and higher infectivity.

337

338 The phylogenetic analysis showed that the strains from the two groups belonged to  
339 different lineages. The whole genomic analysis revealed that the case samples from  
340 group-DX B.1.1.7 had 3-4 specific substitutions in addition to the 28 nucleotide  
341 substitutions corresponding to the B.1.1.7 reference sequence, which indicated that the  
342 strains might have been evolving for some time and transmitted to China. The retrieving  
343 result of the sequences that had the highest similarity with the strains of the Shunyi  
344 B.1.470 group might somehow indicate potential countries of origin. Furthermore, only  
345 two amino acid mutations in the S protein were detected in the strains from the Shunyi  
346 outbreak, which suggested lower transmissibility compared with B.1.1.7 strains.

347

348 The interaction of the SARS-CoV-2 Spike receptor binding domain (RBD) with the  
349 ACE2 receptor on host cells is vital for viral entry and the N501Y amino acid mutation  
350 of B.1.1.7 in RBD of the interface should be favorable for the interaction with  
351 ACE2<sup>14,23,24</sup>. Therefore, N501Y mutation likely increased transmissibility and possibly  
352 pathogenicity of B.1.1.7. Other studies indicated that the deletion of 69-70 amino acids  
353 on S1 N-terminal domain could enhance virulence and confer resistance to the  
354 neutralization antibody of SARS-CoV-2<sup>25</sup>. Fortunately, many recent studies on the



355 protection of existing vaccines against B.1.1.7 variants all indicated that the B.1.1.7  
356 variant will not escape vaccine protection<sup>14,15,23,24</sup>.

357

358 Nevertheless, currently there is no direct biological experimental evidence that can  
359 confirm the increased pathogenicity or virulence of the B.1.1.7 variant and little  
360 evaluation of the clinical characteristics of B.1.1.7 variant infection have been  
361 conducted. This prospective, comparative cohort study of COVID-19 cases from two  
362 COVID-19 outbreaks in Beijing implied that COVID-19 cases led by the B.1.1.7 variant  
363 presented more serious clinical and laboratory characteristics than cases infected with  
364 non-B.1.1.7 variant (lineage B.1.470).

365

366 Limitations of this study exist. Firstly, due to the very low morbidity of COVID-19 now  
367 in China, the sample size in the two groups of this study was relatively small; secondly,  
368 we were not able to compare the clinical features of the cases infected with the B.1.1.7  
369 variant with the cases infected with other SARS-CoV-2 lineages other than B.1.470.  
370 Because during December, 2020 – January 2021, only these two clustered outbreaks had  
371 taken place in Beijing, the data of these two groups was more comparable.

372

### 373 **Contributors**

374 ZC conceived the study; ZC, WX and WZ designed the study; ZC and WZ maintained  
375 database for data collection; ZC, WX and WZ supervised the data collection; WZ, SC,  
376 ZG, DT, YS, GW, XW, YW, PX, YX, TZ, LL, GL and JT interpreted the data; SC, ZG

377 and GW did the statistical analysis; YS, WZ, SC and ZG wrote the manuscript; YS and  
378 SC prepared the figures; YS, XZ, SZ and YW did the COVID-19 specimens processing  
379 and sequencing; All authors reviewed and approved the final version of the manuscript.  
380 ZC, WZ and WX are the guarantors. The corresponding author attests that all listed  
381 authors meet authorship criteria and that no others meeting the criteria have been  
382 omitted.

383

### 384 **Acknowledgments**

385 We thank all physicians who participated in the management of these COVID-19 cases.  
386 The study was funded by the National Key Research and Development Program (grant  
387 nos. 2020YFC0846200 and 2020YFC0848300) and National Natural Science  
388 Foundation of China (grant no. 82072295). The funding body was not involved in the  
389 study design, clinical sample collection, data analysis, and interpretation or writing of  
390 the manuscript.

391

### 392 **Declaration of interest**

393 The authors declare that no competing interests exist.

394

### 395 **Data sharing**

396 The data that support the findings of this study are available from the corresponding  
397 author on reasonable request. Participant data without names and identifiers may be  
398 shared with other researchers after approval from the corresponding author and the

399 authorities including the Institutional Review Board and the National Health  
400 Commission. The proposal with a detailed description of study objectives and a  
401 statistical analysis plan will be needed for evaluation of the reasonability to request for  
402 our data. The corresponding author will make a decision based on these materials.  
403 Following complete publication, the sequence data generated in this study was made  
404 available to researchers through GISAID database (accession nos: EPI\_ISL\_1121993  
405 and EPI\_ISL\_1122015 to 1122017). .

406

### 407 **Ethical approval**

408 The study was approved by the Institutional Review Board of Beijing Ditan Hospital,  
409 Capital Medical University in Beijing (approval number: JDLY2020-020-01).

410

411

412

### 413 **References**

- 414 1. Wang D, Hu B, Hu C, et al. Clinical Characteristics of 138 Hospitalized Patients With 2019 Novel Coronavirus-Infected  
415 Pneumonia in Wuhan, China. *JAMA* 2020; **323**(11): 1061-9.
- 416 2. Zhu N, Zhang D, Wang W, et al. A Novel Coronavirus from Patients with Pneumonia in China, 2019. *N Engl J Med*  
417 2020; **382**(8): 727-33.
- 418 3. Walensky RP, Walke HT, Fauci AS. SARS-CoV-2 Variants of Concern in the United States-Challenges and Opportunities.  
419 *JAMA* 2021.
- 420 4. Tada T, Dcosta BM, Samanovic-Golden M, et al. Neutralization of viruses with European, South African, and United  
421 States SARS-CoV-2 variant spike proteins by convalescent sera and BNT162b2 mRNA vaccine-elicited antibodies. *bioRxiv*  
422 2021.
- 423 5. Fujino T, Nomoto H, Kutsuna S, et al. Novel SARS-CoV-2 Variant Identified in Travelers from Brazil to Japan. *Emerg*  
424 *Infect Dis* 2021; **27**(4).
- 425 6. Dao MH, Nguyen HT, Nguyen TV, et al. New SARS-CoV-2 Variant of Concern Imported from the United Kingdom to  
426 Vietnam, December 2020. *J Med Virol* 2021.
- 427 7. Brookman S, Cook J, Zucherman M, Broughton S, Harman K, Gupta A. Effect of the new SARS-CoV-2 variant B.1.1.7

- 428 on children and young people. *Lancet Child Adolesc Health* 2021.
- 429 8. Mwenda M, Saasa N, Sinyange N, et al. Detection of B.1.351 SARS-CoV-2 Variant Strain - Zambia, December 2020.  
430 *MMWR Morb Mortal Wkly Rep* 2021; **70**(8): 280-2.
- 431 9. Rambaut A, Holmes EC, O'Toole A, et al. A dynamic nomenclature proposal for SARS-CoV-2 lineages to assist genomic  
432 epidemiology. *Nat Microbiol* 2020; **5**(11): 1403-7.
- 433 10. Rambaut A, Holmes EC, O'Toole A, et al. Addendum: A dynamic nomenclature proposal for SARS-CoV-2 lineages to  
434 assist genomic epidemiology. *Nat Microbiol* 2021; **6**(3): 415.
- 435 11. Alpert T, Lasek-Nesselquist E, Brito AF, et al. Early introductions and community transmission of SARS-CoV-2 variant  
436 B.1.1.7 in the United States. *medRxiv* 2021.
- 437 12. Eurosurveillance editorial t. Updated rapid risk assessment from ECDC on the risk related to the spread of new SARS-  
438 CoV-2 variants of concern in the EU/EEA - first update. *Euro Surveill* 2021; **26**(3).
- 439 13. Davies NG, Abbott S, Barnard RC, et al. Estimated transmissibility and severity of novel SARS-CoV-2 Variant of  
440 Concern 202012/01 in England. *medRxiv* 2021.
- 441 14. Graham C, Seow J, Huettner I, et al. Impact of the B.1.1.7 variant on neutralizing monoclonal antibodies recognizing  
442 diverse epitopes on SARS-CoV-2 Spike. *bioRxiv* 2021.
- 443 15. Muik A, Wallisch AK, Sanger B, et al. Neutralization of SARS-CoV-2 lineage B.1.1.7 pseudovirus by BNT162b2 vaccine-  
444 elicited human sera. *Science* 2021.
- 445 16. Peter Horby CH, Nick Davies, John, Edmunds, Neil Ferguson, Graham Medley, Andrew Hayward, Muge Cevik, Calum  
446 Semple. NERVTAG note on B.1.1.7 severity. In: SAGE, editor.; 2021.
- 447 17. Shu Y, McCauley J. GISAID: Global initiative on sharing all influenza data - from vision to reality. *Euro Surveill* 2017;  
448 **22**(13).
- 449 18. Kidd M, Richter A, Best A, et al. S-variant SARS-CoV-2 lineage B1.1.7 is associated with significantly higher viral loads  
450 in samples tested by ThermoFisher TaqPath RT-qPCR. *J Infect Dis* 2021.
- 451 19. Liu K, Chen Y, Lin R, Han K. Clinical features of COVID-19 in elderly patients: A comparison with young and middle-  
452 aged patients. *J Infect* 2020; **80**(6): e14-e8.
- 453 20. Han W, Zhu M, Chen J, et al. Lung Transplantation for Elderly Patients With End-Stage COVID-19 Pneumonia. *Ann*  
454 *Surg* 2020; **272**(1): e33-e4.
- 455 21. Armitage R, Nellums LB. COVID-19 and the consequences of isolating the elderly. *Lancet Public Health* 2020; **5**(5):  
456 e256.
- 457 22. Petretto DR, Pili R. Ageing and COVID-19: What is the Role for Elderly People? *Geriatrics (Basel)* 2020; **5**(2).
- 458 23. Firestone MJ, Lorentz AJ, Wang X, et al. First Identified Cases of SARS-CoV-2 Variant B.1.1.7 in Minnesota - December  
459 2020-January 2021. *MMWR Morb Mortal Wkly Rep* 2021; **70**(8): 278-9.
- 460 24. Edara VV, Floyd K, Lai L, et al. Infection and mRNA-1273 vaccine antibodies neutralize SARS-CoV-2 UK variant.  
461 *medRxiv* 2021.
- 462 25. Xie X, Liu Y, Liu J, et al. Neutralization of SARS-CoV-2 spike 69/70 deletion, E484K and N501Y variants by BNT162b2  
463 vaccine-elicited sera. *Nat Med* 2021.

464

465

466

467

468 **Tables**

469 **Table 1.** Comparison of the whole-genome features between the two groups

| Features                                                               | Daxing B.1.1.7 group                                                                                                                                                                                                                                                         | Shunyi B.1.470 group                                                                                                                                                                                             |
|------------------------------------------------------------------------|------------------------------------------------------------------------------------------------------------------------------------------------------------------------------------------------------------------------------------------------------------------------------|------------------------------------------------------------------------------------------------------------------------------------------------------------------------------------------------------------------|
| No. of sequences                                                       | 7                                                                                                                                                                                                                                                                            | 2                                                                                                                                                                                                                |
| PANGO lineage                                                          | B.1.1.7                                                                                                                                                                                                                                                                      | B.1.470                                                                                                                                                                                                          |
| VOC or not                                                             | VOC-202012/01                                                                                                                                                                                                                                                                | non-VOC                                                                                                                                                                                                          |
| No. of shared nucleotide substitutions                                 | 31                                                                                                                                                                                                                                                                           | 24                                                                                                                                                                                                               |
| Shared nucleotide substitution sites (ref. Wuhan-Hu-1, EPI_ISL_402119) | C241T, C913T, C3037T, C3267T, C5388A, C5986T, T6954C, C12036G, C12747T, C12970T, C14408T, C14676T, C15279T, T16176C, A23063T, C23271A, A23403G, C23604A, C23709T, T24506G, G24914C, C27972T, G28048T, A28111G, G28280C, A28281T, T28282A, G28881A, G28882A, G28883C, C28977T | C241T, C1454G, C3037T, T6778C, C9679T, G11291A, T11296G, C14120T, C14408T, C17421T, G18315A, C18687T, C18877T, C21597T, A23403G, G25563T, G25855C, G26051T, C26681T, C26735T, G27870T, C27903T, C28887T, C29311T |
| Additional substitution site                                           | T21991G                                                                                                                                                                                                                                                                      | T20246G                                                                                                                                                                                                          |
| Amino acid mutations on Spike protein                                  | H69-V70del, Y144del<br>N501Y, A570D, D614G, P681H,<br>T716I, S982A, D1118H                                                                                                                                                                                                   | S12F, D614G                                                                                                                                                                                                      |

470  
471  
472  
473  
474  
475  
476  
477  
478  
479  
480  
481

482

**Table 2.** Comparison of the general situation and clinical manifestations between the

483

two groups

| Variable                                | Daxing B.1.1.7 group<br>(n = 33) | Shunyi B.1.470 group<br>(n = 41) | P value      |
|-----------------------------------------|----------------------------------|----------------------------------|--------------|
| Male [n, (%)]                           | 15 (45.50)                       | 25 (61.00)                       | 0.183        |
| Age                                     | 39.00 (30.50, 62.50)             | 31.00 (27.50, 41.00)             | 0.014        |
| Days from onset to admission            | 1.00 (1.00, 2.00)                | 1.00 (1.00, 3.00)                | 0.133        |
| Body Mass Index                         | 23.11 (20.84, 25.08)             | 22.48 (20.45, 25.57)             | 0.898        |
| <b>Clinical severity level [n, (%)]</b> |                                  |                                  |              |
| Asymptomatic                            | 4(12.12)                         | 8 (19.51)                        | 0.391        |
| Mild                                    | 7 (21.21)                        | 13 (31.70)                       | 0.312        |
| Moderate                                | 22 (66.67)                       | 20 (48.78)                       | 0.123        |
| Severe                                  | 0 (0.00)                         | 0 (0.00)                         | -            |
| Critical                                | 0 (0.00)                         | 0 (0.00)                         | -            |
| <b>Underlying disease [n, (%)]</b>      | <b>13 (39.39)</b>                | <b>14 (34.15)</b>                | <b>0.641</b> |
| Hypertension                            | 3 (9.09)                         | 6 (14.63)                        | 0.723        |
| Diabetes                                | 2 (6.06)                         | 3 (7.32)                         | > 0.999      |
| <b>Clinical manifestations [n, (%)]</b> |                                  |                                  |              |
| Fever                                   | 19 (57.58)                       | 19 (46.34)                       | 0.337        |
| Temperature $\geq 38^{\circ}\text{C}$   | 14 (46.43)                       | 9 (21.95)                        | 0.015        |
| Intolerance of cold                     | 2 (6.06)                         | 0 (0.00)                         | 0.195        |
| Dry cough                               | 14 (42.42)                       | 17 (41.46)                       | 0.934        |
| Expectoration                           | 5 (15.15)                        | 4 (9.76)                         | 0.361        |
| Nasal congestion                        | 4 (12.12)                        | 2 (4.88)                         | 0.397        |
| Runny nose                              | 1 (3.03)                         | 2 (4.88)                         | > 0.999      |
| Hyposmia                                | 1 (3.03)                         | 1 (2.44)                         | > 0.999      |
| Hypogeusia                              | 0 (0.00)                         | 1 (2.44)                         | > 0.999      |
| Dry throat/pharyngeal discomfort        | 6 (18.18)                        | 16 (39.02)                       | 0.051        |
| Sore throat                             | 4 (12.12)                        | 3 (7.32)                         | 0.693        |
| Headache                                | 1 (3.03)                         | 3 (7.32)                         | 0.624        |
| Asthenia                                | 5 (15.15)                        | 1 (2.44)                         | 0.083        |
| Dizziness                               | 2 (6.06)                         | 0 (0.00)                         | 0.195        |
| Muscle soreness                         | 3 (9.09)                         | 3 (7.32)                         | > 0.999      |
| Joint pain                              | 1 (3.03)                         | 0 (0.00)                         | 0.446        |
| Shortness of breath                     | 0 (0.00)                         | 0 (0.00)                         | > 0.999      |
| Dyspnea                                 | 0 (0.00)                         | 0 (0.00)                         | > 0.999      |
| Chest tightness                         | 2 (6.06)                         | 2 (4.88)                         | > 0.999      |
| Chest pain                              | 0 (0.00)                         | 0 (0.00)                         | > 0.999      |
| Conjunctival hyperemia                  | 0 (0.00)                         | 0 (0.00)                         | > 0.999      |
| Nausea                                  | 0 (0.00)                         | 2 (4.88)                         | 0.499        |
| Vomiting                                | 0 (0.00)                         | 0 (0.00)                         | > 0.999      |
| Diarrhea                                | 1 (3.03)                         | 2 (4.88)                         | > 0.999      |

Abdominal pain 0 (0.00) 0 (0.00) > 0.999

484

485

486

**Table 3.** Comparison of laboratory tests, CT results and treatment measures

| Variable                                  | Daxing B.1.1.7 group<br>(n = 33) | Shunyi B.1.470 group<br>(n = 41) | P value |
|-------------------------------------------|----------------------------------|----------------------------------|---------|
| <b>Laboratory tests</b>                   |                                  |                                  |         |
| White blood cell count( $\times 10^9/L$ ) | 5.16 (4.32, 7.15)                | 5.69 (4.49, 7.02)                | 0.628   |
| Neutrophil count ( $\times 10^9/L$ )      | 3.23 (2.60, 4.55)                | 3.45 (2.44, 4.64)                | 0.948   |
| Neutrophil percentage (%)                 | 65.30 (54.42, 71.25)             | 62.30 (56.90, 72.96)             | 0.786   |
| Lymphocyte count ( $\times 10^9/L$ )      | 1.42 (0.93, 1.91)                | 1.39 (0.91, 1.82)                | 0.996   |
| Lymphocyte percentage (%)                 | 23.44 (19.25, 34.25)             | 27.40 (18.02, 35.05)             | 0.732   |
| Platelet count( $\times 10^9/L$ )         | 223.00 (185.00, 262.50)          | 217.40 (181.50, 269.00)          | 0.716   |
| C-reactive protein (mg/L)                 | 4.30 (2.45, 12.15)               | 1.80, (0.85, 4.95)               | 0.005   |
| Serum amyloid A (mg/L)                    | 21.50 (12.50, 50.70)             | 12.00 (5.20, 26.95)              | 0.003   |
| Alanine aminotransferase (U/L)            | 16.60 (11.15, 28.50)             | 21.00 (12.55, 37.80)             | 0.370   |
| Aspartate aminotransferase (U/L)          | 26.30 (18.90, 34.15)             | 23.20 (17.85, 29.45)             | 0.236   |
| Lactic Dehydrogenase (U/L)                | 187.50 (170.05, 228.15)          | 194.90 (174.25,224.80)           | 0.708   |
| Creatine Kinase (U/L)                     | 110.50 (53.15,152.40)            | 70.40 (54.35,103.05)             | 0.040   |
| Prothrombin Time (s)                      | 12.20 (11.60,12.70)              | 12.20 (11.45,12.80)              | 0.947   |
| Activated partial thromboplastin Time (s) | 33.50 (30.80,35.10)              | 31.75 (29.50,34.35)              | 0.257   |
| D-dimer (mg/L)                            | 0.31 (0.20, 0.48)                | 0.24 (0.17, 0.31)                | 0.038   |
| <b>T lymphocyte (cells/uL)</b>            |                                  |                                  |         |
| <1027                                     | 14.00 (43.75)                    | 21.00 (53.85)                    | 0.397   |
| $\geq 1027$                               | 18.00 (56.25)                    | 18.00 (46.15)                    |         |
| CD4 <sup>+</sup> T lymphocyte (cells/uL)  |                                  |                                  | 0.003   |
| <706                                      | 21.00 (65.63)                    | 12.00 (30.77)                    |         |
| $\geq 706$                                | 11.00 (34.38)                    | 27.00 (69.23)                    |         |
| CD8 <sup>+</sup> T lymphocyte (cells/uL)  |                                  |                                  |         |
| <320                                      | 15.00 (46.88)                    | 17.00 (43.60)                    | 0.782   |
| $\geq 320$                                | 17.00 (53.13)                    | 22.00 (56.41)                    |         |
| <b>Imaging examination [n, (%)]</b>       |                                  |                                  |         |
| Pneumonia unilateral                      | 10.00 (30.30)                    | 15.00 (36.59)                    | 0.570   |
| Pneumonia                                 | 15.00 (45.45)                    | 11.00 (26.83)                    | 0.095   |
| Ground glass opacity                      | 15.00 (45.45)                    | 5.00 (12.20)                     | 0.001   |
| <b>Antibody detection [n, (%)]</b>        |                                  |                                  |         |
| IgM (+)                                   | 1.00 (3.03)                      | 2.00 (4.88)                      | > 0.999 |
| IgG (+)                                   | 1.00 (3.03)                      | 3.00 (7.32)                      | > 0.999 |
| <b>Treatments [n, (%)]</b>                |                                  |                                  |         |
| Favelavir                                 | 7.00 (21.21)                     | 4.00 (9.76)                      | 0.295   |

|                              |               |               |         |
|------------------------------|---------------|---------------|---------|
| Favelavir + Abidol           | 1.00 (3.03)   | 4.00 (9.76)   | 0.373   |
| Interferon                   | 1.00 (3.03)   | 1.00 (2.44)   | > 0.999 |
| Traditional Chinese medicine | 23.00 (69.70) | 27.00 (65.85) | 0.726   |
| Oxygen inhalation            | 5.00 (15.15)  | 8.00 (19.51)  | 0.624   |

487

488

489 **Table 4.** Risk of CRP, SAA and GGO of patients upon variant (B.1.1.7 variant

490 infection or non-variant infection)

| Outcomes                                                   | Variables | Regression coefficient | Standard error | Wald Chisq Value | P value | Odds ratio | 95% CI for OR |
|------------------------------------------------------------|-----------|------------------------|----------------|------------------|---------|------------|---------------|
| Level of CRP (<7mg/L or ≥7 mg/L)                           | Age       | 0.00                   | 0.01           | 0.03             | 0.854   | 1.00       | [0.98, 1.03]  |
|                                                            | Group     | 1.09                   | 0.54           | 4.02             | 0.045   | 2.79       | [1.03, 0.86]  |
| Level of SAA (<10mg/L or ≥10 mg/L)                         | Age       | 0.03                   | 0.02           | 2.63             | 0.105   | 1.03       | [0.99, 1.06]  |
|                                                            | Group     | 1.62                   | 0.63           | 6.54             | 0.011   | 5.03       | [1.45, 17.35] |
| Had GGO or not                                             | Age       | 0.01                   | 0.02           | 0.69             | 0.408   | 1.01       | [0.98, 1.04]  |
|                                                            | Group     | 1.69                   | 0.61           | 7.80             | 0.005   | 5.42       | [1.66, 17.73] |
| Level of CK (<150U/L or ≥150U/L)                           | Age       | 0.00                   | 0.02           | 0.05             | 0.821   | 1.00       | [0.97, 1.04]  |
|                                                            | Group     | -1.52                  | 0.73           | 4.34             | 0.034   | 0.22       | [0.05, 0.91]  |
| Level of DD (<0.5mg/L or ≥0.5mg/L)                         | Age       | 0.06                   | 0.03           | 6.14             | 0.013   | 1.07       | [1.01, 1.12]  |
|                                                            | Group     | 0.70                   | 0.82           | 0.73             | 0.392   | 2.01       | [0.41, 10.02] |
| Level of CD4 <sup>+</sup> T (<706cells/uL or ≥706cells/uL) | Age       | 0.05                   | 0.02           | 7.55             | 0.006   | 1.05       | [1.01, 1.08]  |
|                                                            | Group     | 1.20                   | 0.55           | 4.77             | 0.029   | 3.31       | [1.13, 9.71]  |

491

492 **Table 5.** Compared lowest RT-qPCR Ct values in two groups

| Lowest Ct values    | Daxing B.1.1.7 group (n=33) | Shunyi B.1.470 group (n=41) | P value |
|---------------------|-----------------------------|-----------------------------|---------|
| ORF1ab (Mean ± SD*) | 23.33 ± 4.24                | 24.31 ± 5.21                | 0.417   |
| N (Mean ± SD)       | 20.58 ± 4.34                | 23.22 ± 5.37                | 0.036   |

493 \*SD, Standard Deviation

494

495



496 **Table 6.** Risk of Ct values of N gene-target of patients upon variant (B.1.1.7  
497 variant infection or non-variant infection)  
498

| <b>Variables</b> | <b>Regression coefficient</b> | <b>Standard error</b> | <b>Wald Chisq Value</b> | <b>P value</b> | <b>Odds ratio</b> | <b>95% CI for OR</b> |
|------------------|-------------------------------|-----------------------|-------------------------|----------------|-------------------|----------------------|
| Age              | -0.01                         | 0.02                  | 0.42                    | 0.518          | 0.99              | [0.96, 1.02]         |
| Group            | 1.50                          | 0.67                  | 5.08                    | 0.024          | 4.48              | [1.22, 16.53]        |

499

500

501

502

503

504

505

506

507

508

509

510

511

512

513

514

515

516

517

518

519

520

521

## 522 Figures and Figure legends

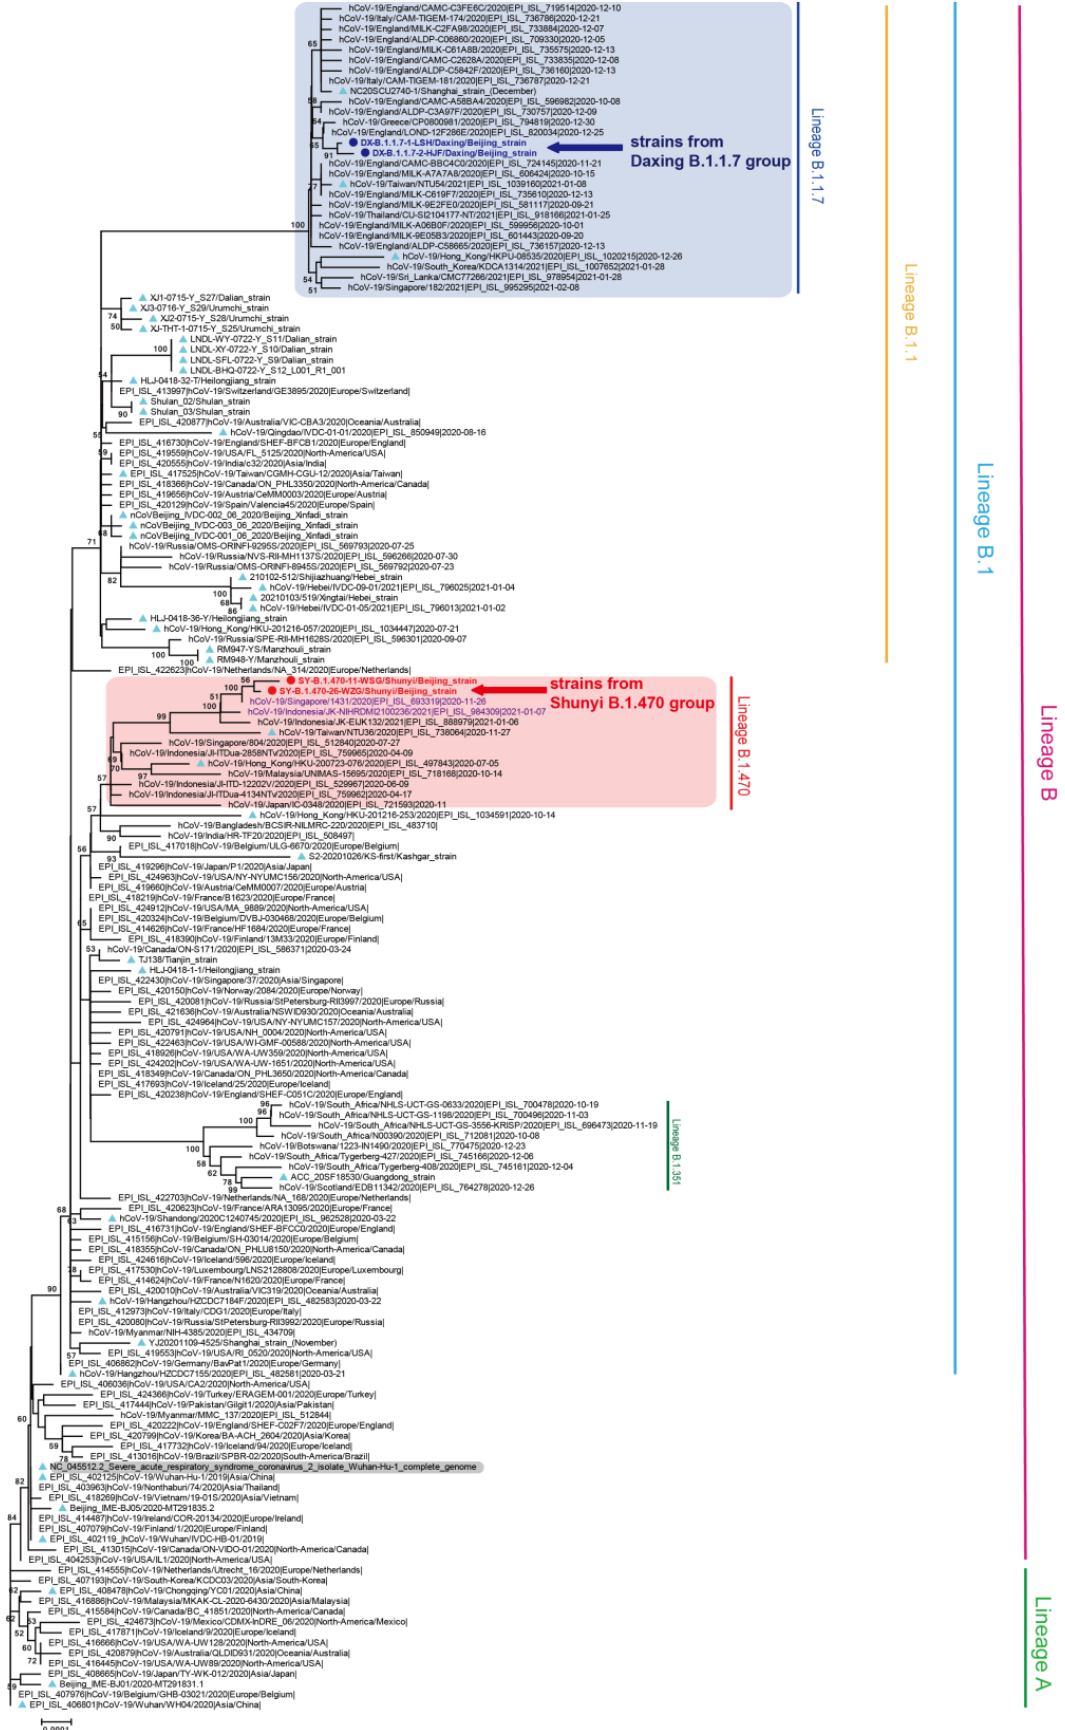

524

525 **Figure 1.** Neighbor-Joining phylogenetic tree based on the whole genome sequences of  
526 the SARS-CoV-2 representative strains. The two representative strains from the Daxing  
527 B.1.1.7 group were indicated by deep blue dots, font and a left arrow; while the strains  
528 from the Shunyi B.1.470 group were indicated by red dots, font and a left arrow. Strains  
529 associated with other previous outbreaks in China were indicated with ice blue triangles.  
530 The B.1.1.7 and B.1.470 lineage was highlighted with blue and light red background,  
531 respectively, the two strains that shared high homology with the strains of the Shunyi  
532 B.1.470 group were colored in purple font. The Wuhan reference strain was shaded in  
533 gray. The PANGO lineages were marked and colored on the right. The tree was rooted  
534 using strain WH04 (EPI\_ISL\_406801) in accord with the root of Pangolin tree.

535

536

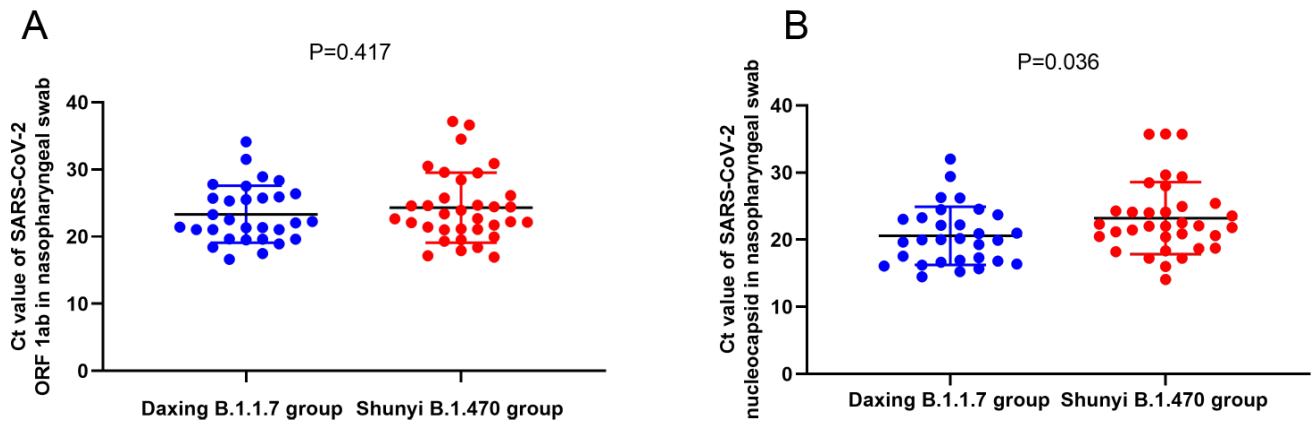

537

538

539 **Figure 2.** Scatter plot of the RT-qPCR Ct values of the Daxing B.1.1.7 group and the  
540 Shunyi B.1.470 group. (A) Ct values of OFR1ab-gene target; (B) Ct values of N-gene  
541 target. Samples from the Daxing B.1.1.7 group were shown as red dots while from the  
542 Shunyi B.1.470 group as blue dots. Median Ct was indicated by a black horizon bar.
